# Supplementary material
Source: PubMed Central journal article supplement (PMC4187118)
Supplement: NIHMS622472-supplement-Supplement.pdf [file NIHMS622472-supplement-Supplement.pdf]

# Supplementary material

(*TrAC-Trends in Analytical Chemistry*)

## Comprehensive analysis of lipids in biological systems by liquid chromatography–mass spectrometry

Tomas Cajka, Oliver Fiehn

*UC Davis Genome Center – Metabolomics, University of California, Davis, 451 Health Sciences Drive, Davis, CA 95616, USA*

**Table S1**

Overview of analyzed biological material in LC–MS-based lipidomics papers

| <i>Matrix</i>             | <i>References</i>                         |
|---------------------------|-------------------------------------------|
| Plasma or serum           | [1-82]                                    |
| Animal tissues            | [17,28,34-36,40,44,56,60,62,65,79,83-117] |
| Cells                     | [10,34,62,65,69,85,106,114,118-154]       |
| Plant tissues             | [94,155-160]                              |
| Apicoplasts               | [161]                                     |
| Microsomes                | [162]                                     |
| Mitochondria              | [163-166]                                 |
| Lipoprotein particles     | [167-170]                                 |
| Milk                      | [171-173]                                 |
| Oxidized oils             | [174]                                     |
| <i>Drosophila</i>         | [175]                                     |
| Microalgae                | [176]                                     |
| Mesenteric lymph          | [33]                                      |
| Cerebrospinal fluid       | [65]                                      |
| Placental microvesicle    | [177]                                     |
| Synovial fluid            | [178]                                     |
| Tear samples              | [179]                                     |
| Sebum                     | [154]                                     |
| Hetapocyte lipid droplets | [180]                                     |
| Urine                     | [181-183]                                 |
| Solid fecal material      | [184]                                     |

**Table S2**

Overview of liquid chromatography configurations in LC–MS-based lipidomics papers

| <i>LC configuration</i>                        | <i>References</i>                                                                                                                                                                                       |
|------------------------------------------------|---------------------------------------------------------------------------------------------------------------------------------------------------------------------------------------------------------|
| Reversed-phase LC                              | [1-32,34,36,37,39-42,44-59,61-65,67-74,78-82,84,86-89,92-96,98-106,108-113,115,116,118,119,121-123,125,127,130,131,135-139,141,142,147,149,151-153,156-159,161-164,166,167,169,170,172,174-176,178-185] |
| Capillary and nanobore reversed-phase LC       | [23,61,69,111,167,181,182]                                                                                                                                                                              |
| Normal-phase LC                                | [4,14,26,33,46,66,75-77,83,85,90,91,93,99,103,107,113,114,117,120,125,128,132-134,138,140,144-146,148,150,153,165-167,175,177]                                                                          |
| Hydrophilic interaction chromatography (HILIC) | [6,35,37,38,43,60,84,94,97,124-126,154,155,168,172,173]                                                                                                                                                 |
| Supercritical fluid chromatography (SFC)       | [12,160,171]                                                                                                                                                                                            |
| Two-dimensional liquid chromatography (2D-LC)  | [6,14,23,84,93,94,103,153,162,172]                                                                                                                                                                      |

## References

- [1] J.M. Choi, T.E. Kim, J.Y. Cho, H.J. Lee, B.H. Jung, Development of lipidomic platform and phosphatidylcholine retention time index for lipid profiling of rosuvastatin treated human plasma, *J. Chromatogr. B* 944C (2014) 157-165.
- [2] S. Chen, C. Wei, P. Gao, H. Kong, Z. Jia, C. Hu, W. Dai, Y. Wu, G. Xu, Effect of *Allium macrostemon* on a rat model of depression studied by using plasma lipid and acylcarnitine profiles from liquid chromatography/mass spectrometry, *J. Pharm. Biomed. Anal.* 89 (2014) 122-129.
- [3] C. Pizarro, I. Arenzana-Ramila, N. Perez-Del-Notario, P. Perez-Matute, J.M. Gonzalez-Saiz, Plasma lipidomic profiling method based on ultrasound extraction and liquid chromatography mass spectrometry, *Anal. Chem.* 85 (2013) 12085-12092.
- [4] E.C.P. Chua, G.H. Shui, I.T.G. Lee, P. Lau, L.C. Tan, S.C. Yeo, B.D. Lam, S. Bulchand, S.A. Summers, K. Puvanendran, S.G. Rozen, M.R. Wenk, J.J. Gooley, Extensive diversity in circadian regulation of plasma lipids and evidence for different circadian metabolic phenotypes in humans, *P. Natl. Acad. Sci. USA* 110 (2013) 14468-14473.
- [5] V. Gonzalez-Covarrubias, M. Beekman, H.W. Uh, A. Dane, J. Troost, I. Paliukhovich, F.M. van der Kloet, J. Houwing-Duistermaat, R.J. Vreeken, T. Hankemeier, E.P. Slagboom, Lipidomics of familial longevity, *Aging Cell* 12 (2013) 426-434.
- [6] S. Wang, J. Li, X. Shi, L. Qiao, X. Lu, G. Xu, A novel stop-flow two-dimensional liquid chromatography-mass spectrometry method for lipid analysis, *J. Chromatogr. A* 1321 (2013) 65-72.
- [7] S.I. Wickramasekara, F. Zandkarimi, J. Morr e, J. Kirkwood, L. Legette, Y. Jiang, A.F. Gombart, J.F. Stevens, C.S. Maier, Electrospray quadrupole travelling wave ion mobility time-of-flight mass spectrometry for the detection of plasma metabolome changes caused by xanthohumol in obese Zucker (*fa/fa*) rats, *Metabolites* 3 (2013) 701-717.
- [8] L. Cui, Y.H. Lee, K. Yadunanda, F.G. Xu, K. Lu, E.E. Ooi, S.R. Tannenbaum, C.N. Ong, Serum metabolome and lipidome changes in adult patients with primary dengue infection, *Plos Neglect. Trop. Dis.* 7 (2013).
- [9] V. Shah, J.M. Castro-Perez, D.G. McLaren, K.B. Herath, S.F. Previs, T.P. Roddy, Enhanced data-independent analysis of lipids using ion mobility-TOFMS to unravel quantitative and qualitative information in human plasma, *Rapid Commun. Mass Spectrom.* 27 (2013) 2195-2200.
- [10] J. Ivanisevic, Z.J. Zhu, L. Plate, R. Tautenhahn, S. Chen, P.J. O'Brien, C.H. Johnson, M.A. Marletta, G.J. Patti, G. Siuzdak, Toward 'omic scale metabolite profiling: A dual separation-mass spectrometry approach for coverage of lipid and central carbon metabolism, *Anal. Chem.* 85 (2013) 6876-6884.
- [11] Y.H. Yang, C. Cruickshank, M. Armstrong, S. Mahaffey, R. Reisdorph, N. Reisdorph, New sample preparation approach for mass spectrometry-based profiling of plasma results in improved coverage of metabolome, *J. Chromatogr. A* 1300 (2013) 217-226.
- [12] T. Yamada, T. Uchikata, S. Sakamoto, Y. Yokoi, S. Nishiumi, M. Yoshida, E. Fukusaki, T. Bamba, Supercritical fluid chromatography/Orbitrap mass spectrometry based lipidomics platform coupled with automated lipid identification software for accurate lipid profiling, *J. Chromatogr. A* 1301 (2013) 237-242.
- [13] T. Yamada, T. Uchikata, S. Sakamoto, Y. Yokoi, E. Fukusaki, T. Bamba, Development of a lipid profiling system using reverse-phase liquid chromatography coupled to high-resolution mass spectrometry with rapid polarity switching and an automated lipid identification software, *J. Chromatogr. A* 1292 (2013) 211-218.
- [14] M. Li, B.S. Feng, Y. Liang, W. Zhang, Y. Bai, W. Tang, T. Wang, H.W. Liu, Lipid profiling of human plasma from peritoneal dialysis patients using an improved 2D (NP/RP) LC-QToF MS method, *Anal. Bioanal. Chem.* 405 (2013) 6629-6638.
- [15] H.Y. Kwan, Y.M. Hu, C.L. Chan, H.H. Cao, C.Y. Cheng, S.Y. Pan, K.W. Tse, Y.C. Wu, Z.L. Yu, W.F. Fong, Lipidomics identification of metabolic biomarkers in chemically induced hypertriglyceridemic mice, *J. Proteome Res.* 12 (2013) 1387-1398.
- [16] H. Kulkarni, P.J. Meikle, M. Mamtani, J.M. Weir, C.K. Barlow, J.B. Jowett, C. Bellis, T.D. Dyer, M.P. Johnson, D.L. Rainwater, L. Almasy, M.C. Mahaney, A.G. Comuzzie, J. Blangero, J.E. Curran, Plasma lipidomic profile signature of hypertension in Mexican American families: Specific role of diacylglycerols, *Hypertension* 62 (2013) 621-626.

- [17] M. Jove, V. Ayala, O. Ramirez-Nunez, J.C.E. Serrano, A. Cassanye, L. Arola, A. Caimari, J.M. del Bas, A. Crescenti, R. Pamplona, M. Portero-Otin, Lipidomic and metabolomic analyses reveal potential plasma biomarkers of early atheromatous plaque formation in hamsters, *Cardiovasc Res.* 97 (2013) 642-652.
- [18] G. Gurdeniz, D. Rago, N.T. Bendtsen, F. Savorani, A. Astrup, L.O. Dragsted, Effect of trans fatty acid intake on LC-MS and NMR plasma profiles, *PLoS One* 8 (2013).
- [19] V. Gonzalez-Covarrubias, A. Dane, T. Hankemeier, R.J. Vreeken, The influence of citrate, EDTA, and heparin anticoagulants to human plasma LC-MS lipidomic profiling, *Metabolomics* 9 (2013) 337-348.
- [20] J. Godzien, M. Ciborowski, L. Whiley, C. Legido-Quigley, F.J. Ruperez, C. Barbas, In-vial dual extraction liquid chromatography coupled to mass spectrometry applied to streptozotocin-treated diabetic rats. Tips and pitfalls of the method, *J. Chromatogr. A* 1304 (2013) 52-60.
- [21] H. Gallart-Ayala, F. Courant, S. Severe, J.P. Antignac, F. Morio, J. Abadie, B. Le Bizec, Versatile lipid profiling by liquid chromatography-high resolution mass spectrometry using all ion fragmentation and polarity switching. Preliminary application for serum samples phenotyping related to canine mammary cancer, *Anal. Chim. Acta* 796 (2013) 75-83.
- [22] S. Chen, P. Yin, X. Zhao, W. Xing, C. Hu, L. Zhou, G. Xu, Serum lipid profiling of patients with chronic hepatitis B, cirrhosis, and hepatocellular carcinoma by ultra fast LC/IT-TOF MS, *Electrophoresis* 34 (2013) 2848-2856.
- [23] D.Y. Bang, M.H. Moon, On-line two-dimensional capillary strong anion exchange/reversed phase liquid chromatography-tandem mass spectrometry for comprehensive lipid analysis, *J. Chromatogr. A* 1310 (2013) 82-90.
- [24] J.M. Weir, G. Wong, C.K. Barlow, M.A. Greeve, A. Kowalczyk, L. Almasy, A.G. Comuzzie, M.C. Mahaney, J.B. Jowett, J. Shaw, J.E. Curran, J. Blangero, P.J. Meikle, Plasma lipid profiling in a large population-based cohort, *J. Lipid Res.* 54 (2013) 2898-2908.
- [25] F. Qu, S.J. Zheng, C.S. Wu, Z.X. Jia, J.L. Zhang, Z.P. Duan, Lipidomic profiling of plasma in patients with chronic hepatitis C infection, *Anal. Bioanal. Chem.* (2013) 555-564.
- [26] G.H. Shui, S.M. Lam, J. Stebbins, J. Kusunoki, X.R. Duan, B.W. Li, W.F. Cheong, D. Soon, R.P. Kelly, M.R. Wenk, Polar lipid derangements in type 2 diabetes mellitus: potential pathological relevance of fatty acyl heterogeneity in sphingolipids, *Metabolomics* 9 (2013) 786-799.
- [27] E.L. Donovan, S.M. Pettine, M.S. Hickey, K.L. Hamilton, B.F. Miller, Lipidomic analysis of human plasma reveals ether-linked lipids that are elevated in morbidly obese humans compared to lean, *Diabetol. Metab. Syndr.* 5 (2013).
- [28] Y. Tajima, M. Ishikawa, K. Maekawa, M. Murayama, Y. Senoo, T. Nishimaki-Mogami, H. Nakanishi, K. Ikeda, M. Arita, R. Taguchi, A. Okuno, R. Mikawa, S. Niida, O. Takikawa, Y. Saito, Lipidomic analysis of brain tissues and plasma in a mouse model expressing mutated human amyloid precursor protein/tau for Alzheimer's disease, *Lipids Health Dis.* 12 (2013).
- [29] M. Ishikawa, Y. Tajima, M. Murayama, Y. Senoo, K. Maekawa, Y. Saito, Plasma and serum from nonfasting men and women differ in their lipidomic profiles, *Biol. Pharm. Bull.* 36 (2013) 682-685.
- [30] H.Y. Zhang, J.R. Wang, L.F. Yau, H.M. Ho, C.L. Chan, P. Hu, L. Liu, Z.H. Jiang, A cellular lipidomic study on the A beta-induced neurotoxicity and neuroprotective effects of EGCG by using UPLC/MS-based glycerolipids profiling and multivariate analysis, *Mol. Biosyst.* 8 (2012) 3208-3215.
- [31] X.J. Yan, J.L. Xu, J.J. Chen, D.Y. Chen, S.L. Xu, Q.J. Luo, Y.J. Wang, Lipidomics focusing on serum polar lipids reveals species dependent stress resistance of fish under tropical storm, *Metabolomics* 8 (2012) 299-309.
- [32] L. Whiley, J. Godzien, F.J. Ruperez, C. Legido-Quigley, C. Barbas, In-vial dual extraction for direct LC-MS analysis of plasma for comprehensive and highly reproducible metabolic fingerprinting., *Anal. Chem.* 84 (2012) 5992-5999.
- [33] K. Morishita, J. Aiboshi, T. Kobayashi, S. Mikami, Y. Yokoyama, K. Ogawa, H. Yokota, Y. Otomo, Lipidomics analysis of mesenteric lymph after trauma and hemorrhagic shock, *J. Trauma Acute Care* 72 (2012) 1541-1547.
- [34] X.L. Gao, Q.B. Zhang, D. Meng, G. Isaac, R. Zhao, T.L. Fillmore, R.K. Chu, J.Y. Zhou, K.Q. Tang, Z.P. Hu, R.J. Moore, R.D. Smith, M.G. Katze, T.O. Metz, A reversed-phase capillary ultra-performance liquid chromatography-mass spectrometry (UPLC-MS) method for comprehensive top-down/bottom-up lipid profiling, *Anal. Bioanal. Chem.* 402 (2012) 2923-2933.

- [35] E. Cifkova, M. Holcapek, M. Lisa, M. Ovcacikova, A. Lycka, F. Lynen, P. Sandra, Nontargeted quantitation of lipid classes using hydrophilic interaction liquid chromatography-electrospray ionization mass spectrometry with single internal standard and response factor approach, *Anal. Chem.* 84 (2012) 10064-10070.
- [36] M.N. Barber, S. Risis, C. Yang, P.J. Meikle, M. Staples, M.A. Febbraio, C.R. Bruce, Plasma lysophosphatidylcholine levels are reduced in obesity and type 2 diabetes, *PLoS One* 7 (2012).
- [37] G.G. Tan, Z.Y. Lou, W.T. Liao, X. Dong, Z.Y. Zhu, W.H. Li, Y.F. Chai, Hydrophilic interaction and reversed-phase ultraperformance liquid chromatography TOF-MS for serum metabonomic analysis of myocardial infarction in rats and its applications, *Mol. Biosyst.* 8 (2012) 548-556.
- [38] C. Zhu, A. Dane, G. Spijksma, M. Wang, J. van der Greef, G.A. Luo, T. Hankemeier, R.J. Vreeken, An efficient hydrophilic interaction liquid chromatography separation of 7 phospholipid classes based on a diol column, *J. Chromatogr. A* 1220 (2012) 26-34.
- [39] I. Ottestad, S. Hassani, G.I. Borge, A. Kohler, G. Vogt, T. Hyotylainen, M. Oresic, K.W. Bronner, K.B. Holven, S.M. Ulven, M.C.W. Myhrstad, Fish oil supplementation alters the plasma lipidomic profile and increases long-chain PUFAs of phospholipids and triglycerides in healthy subjects, *PLoS One* 7 (2012).
- [40] H. Nygren, T. Seppänen-Laakso, S. Castillo, T. Hyötyläinen, M. Orešič, in T.O. Metz (Editor), *Methods Mol. Biol.*, Humana Press, New York, 2011, p. 247-257.
- [41] H. Nygren, P. Poho, T. Seppanen-Laakso, U. Lahtinen, M. Oresic, T. Hyotylainen, Ultrahigh-performance liquid chromatography-mass spectrometry in lipidomics, *LC GC Eur.* 26 (2013) 142-+.
- [42] M. Oresic, T. Hyotylainen, A. Kotronen, P. Gopalacharyulu, H. Nygren, J. Arola, S. Castillo, I. Mattila, A. Hakkarainen, R.J.H. Borra, M.J. Honka, A. Verrijken, S. Francque, P. Iozzo, M. Leivonen, N. Jaser, A. Juuti, T.I.A. Sorensen, P. Nuutila, L. Van Gaal, H. Yki-Jarvinen, Prediction of non-alcoholic fatty-liver disease and liver fat content by serum molecular lipids, *Diabetologia* 56 (2013) 2266-2274.
- [43] M. Mal, S. Wong, A HILIC-based UPLC/MS method for the separation of lipid classes from plasma, *Waters Application Note 720004048en* (2011).
- [44] G. Isaac, S. McDonald, G. Astarita, Lipid separation using UPLC with charged surface hybrid technology, *Waters Application Note* (2011).
- [45] S.S. Bird, V.R. Marur, M.J. Sniatynski, H.K. Greenberg, B.S. Kristal, Serum lipidomics profiling using LC-MS and high-energy collisional dissociation fragmentation: Focus on triglyceride detection and characterization, *Anal. Chem.* 83 (2011) 6648-6657.
- [46] G.H. Shui, J.W. Stebbins, B.D. Lam, W.F. Cheong, S.M. Lam, F. Gregoire, J. Kusonoki, M.R. Wenk, Comparative plasma lipidome between human and cynomolgus monkey: are plasma polar lipids good biomarkers for diabetic monkeys?, *PLoS One* 6 (2011).
- [47] P.J. Meikle, G. Wong, D. Tsorotes, C.K. Barlow, J.M. Weir, M.J. Christopher, G.L. MacIntosh, B. Goudey, L. Stern, A. Kowalczyk, I. Haviv, A.J. White, A.M. Dart, S.J. Duffy, G.L. Jennings, B.A. Kingwell, Plasma lipidomic analysis of stable and unstable coronary artery disease, *Arterioscler. Thromb. Vasc. Biol.* 31 (2011) 2723-2732.
- [48] J. Castro-Perez, T.P. Roddy, N.M.M. Nibbering, V. Shah, D.G. McLaren, S. Previs, A.B. Attygalle, K. Herath, Z. Chen, S.P. Wang, L. Mitnau, B.K. Hubbard, R.J. Vreeken, D.G. Johns, T. Hankemeier, Localization of fatty acyl and double bond positions in phosphatidylcholines using a dual stage CID fragmentation coupled with ion mobility mass spectrometry, *J. Am. Soc. Mass Spectr.* 22 (2011) 1552-1567.
- [49] M. Ollero, G. Astarita, I.C. Guerrero, I. Sermet-Gaudelus, S. Trudel, D. Piomelli, A. Edelman, Plasma lipidomics reveals potential prognostic signatures within a cohort of cystic fibrosis patients, *J. Lipid Res.* 52 (2011) 1011-1022.
- [50] C. Hu, H. Kong, F. Qu, Y. Li, Z. Yu, P. Gao, S. Peng, G. Xu, Application of plasma lipidomics in studying the response of patients with essential hypertension to antihypertensive drug therapy, *Mol. Biosyst.* 7 (2011) 3271-3279.
- [51] M. Oresic, J. Tang, T. Seppanen-Laakso, I. Mattila, S.E. Saarni, S.I. Saarni, J. Lonnqvist, M. Sysi-Aho, T. Hyotylainen, J. Perala, J. Suvisaari, Metabolome in schizophrenia and other psychotic disorders: a general population-based study, *Genome Med.* 3 (2011).

- [52] M. Lankinen, U. Schwab, T. Seppanen-Laakso, I. Mattila, K. Juntunen, H. Mykkanen, K. Poutanen, H. Gylling, M. Oresic, Metabolomic analysis of plasma metabolites that may mediate effects of rye bread on satiety and weight maintenance in postmenopausal women, *J. Nutr.* 141 (2011) 31-36.
- [53] M. Lankinen, U. Schwab, M. Kolehmainen, J. Paananen, K. Poutanen, H. Mykkanen, T. Seppanen-Laakso, H. Gylling, M. Uusitupa, M. Oresic, Whole grain products, fish and bilberries alter glucose and lipid metabolism in a randomized, controlled trial: the Sysdimet study, *PLoS One* 6 (2011).
- [54] P. Del Boccio, D. Pieragostino, M. Di Ioia, F. Petrucci, A. Lugaresi, G. De Luca, D. Gambi, M. Onofrij, C. Di Ilio, P. Sacchetta, A. Urbani, Lipidomic investigations for the characterization of circulating serum lipids in multiple sclerosis, *J. Proteomics* 74 (2011) 2826-2836.
- [55] C.X. Hu, H. Wei, H.W. Kong, J. Bouwman, V. Gonzalez-Covarrubias, R. van der Heijden, T.H. Reijmers, X. Bao, E.R. Verheij, T. Hankemeier, G.W. Xu, J. van der Greef, M. Wang, Linking biological activity with herbal constituents by systems biology-based approaches: effects of Panax ginseng in type 2 diabetic Goto-Kakizaki rats, *Mol. Biosyst.* 7 (2011) 3094-3103.
- [56] C.X. Hu, H. Wei, A.M. van den Hoek, M. Wang, R. van der Heijden, G. Spijksma, T.H. Reijmers, J. Bouwman, S. Wopereis, L.M. Havekes, E. Verheij, T. Hankemeier, G.W. Xu, J. van der Greef, Plasma and liver lipidomics response to an intervention of rimonabant in ApoE\*3Leiden.CETP transgenic mice, *PLoS One* 6 (2011).
- [57] M. Sysi-Aho, A. Ermolov, P.V. Gopalacharyulu, A. Tripathi, T. Seppanen-Laakso, J. Maukonen, I. Mattila, S.T. Ruohonen, L. Vahatalo, L. Yetukuri, T. Harkonen, E. Lindfors, J. Nikkila, J. Ilonen, O. Simell, M. Saarela, M. Knip, S. Kaski, E. Savontaus, M. Oresic, Metabolic regulation in progression to autoimmune diabetes, *PLoS Comput. Biol.* 7 (2011).
- [58] J.M. Castro-Perez, J. Kamphorst, J. DeGroot, F. Lafeber, J. Goshawk, K. Yu, J.P. Shockcor, R.J. Vreeken, T. Hankemeier, Comprehensive LC-MSE lipidomic analysis using a shotgun approach and its application to biomarker detection and identification in osteoarthritis patients, *J. Proteome Res.* 9 (2010) 2377-2389.
- [59] K. Sandra, A.D. Pereira, G. Vanhoenacker, F. David, P. Sandra, Comprehensive blood plasma lipidomics by liquid chromatography/quadrupole time-of-flight mass spectrometry, *J. Chromatogr. A* 1217 (2010) 4087-4099.
- [60] M. Schwalbe-Herrmann, J. Willmann, D. Leibfritz, Separation of phospholipid classes by hydrophilic interaction chromatography detected by electrospray ionization mass spectrometry, *J. Chromatogr. A* 1217 (2010) 5179-5183.
- [61] C.M. Sorensen, J. Ding, Q.B. Zhang, T. Alquier, R. Zhao, P.W. Mueller, R.D. Smith, T.O. Metz, Perturbations in the lipid profile of individuals with newly diagnosed type 1 diabetes mellitus: Lipidomics analysis of a diabetes antibody standardization program sample subset, *Clin. Biochem.* 43 (2010) 948-956.
- [62] Z.W. Zhao, Y. Xu, An extremely simple method for extraction of lysophospholipids and phospholipids from blood samples, *J. Lipid Res.* 51 (2010) 652-659.
- [63] T. Leskinen, R. Rinnankoski-Tuikka, M. Rintala, T. Seppanen-Laakso, E. Pollanen, M. Alen, S. Sipila, J. Kaprio, V. Kovanen, P. Rahkila, M. Oresic, H. Kainulainen, U.M. Kujala, Differences in muscle and adipose tissue gene expression and cardio-metabolic risk factors in the members of physical activity discordant twin pairs, *PLoS One* 5 (2010).
- [64] S. Ahola-Erkkila, C.J. Carroll, K. Peltola-Mjosund, V. Tulkki, I. Mattila, T. Seppanen-Laakso, M. Oresic, H. Tyynismaa, A. Suomalainen, Ketogenic diet slows down mitochondrial myopathy progression in mice, *Hum. Mol. Genet.* 19 (2010) 1974-1984.
- [65] G. Astarita, F. Ahmed, D. Piomelli, in D. Armstrong (Editor), *Lipidomics*, Humana Press, New York, 2009, p. 201-219.
- [66] C. Wang, J. Yang, J.H. Nie, Plasma phospholipid metabolic profiling and biomarkers of rats following radiation exposure based on liquid chromatography-mass spectrometry technique, *Biomed. Chromatogr.* 23 (2009) 1079-1085.
- [67] A. Koulman, G. Woffendin, V.K. Narayana, H. Welchman, C. Crone, D.A. Volmer, High-resolution extracted ion chromatography, a new tool for metabolomics and lipidomics using a second-generation orbitrap mass spectrometer, *Rapid Commun. Mass Spectrom.* 23 (2009) 1411-1418.
- [68] C.X. Hu, J. van Dommelen, R. van der Heijden, G. Spijksma, T.H. Reijmers, M. Wang, E. Slee, X. Lu, G.W. Xu, J. van der Greef, T. Hankemeier, RPLC-ion-trap-FTMS method for lipid profiling of plasma: Method validation and application to p53 mutant mouse model, *J. Proteome Res.* 7 (2008) 4982-4991.

- [69] J. Ding, C.M. Sorensen, N. Jaitly, H.L. Jiang, D.J. Orton, M.E. Monroe, R.J. Moore, R.D. Smith, T.O. Metz, Application of the accurate mass and time tag approach in studies of the human blood lipidome, *J. Chromatogr. B* 871 (2008) 243-252.
- [70] U. Schwab, T. Seppanen-Laakso, L. Yetukuri, J. Agren, M. Kolehmainen, D.E. Laaksonen, A.L. Ruskeepaa, H. Gylling, M. Uusitupa, M. Oresic, G.S. Grp, Triacylglycerol fatty acid composition in diet-induced weight loss in subjects with abnormal glucose metabolism--the GENOBIN study, *PLoS One* 3 (2008).
- [71] H.H.M. Draisma, T.H. Reijmers, I. Bobeldijk-Pastorova, J.J. Meulman, G.F.E.V. Burk, M. Bartels, R. Ramaker, J. Van der Greef, D.I. Boomsma, T. Hankemeier, Similarities and differences in lipidomics profiles among healthy monozygotic twin pairs, *OMICS* 12 (2008) 17-31.
- [72] P.D. Rainville, C.L. Stumpf, J.P. Shockcor, R.S. Plumb, J.K. Nicholson, Novel application of reversed-phase UPLC-oeTOF-MS for lipid analysis in complex biological mixtures: A new tool for lipidomics, *J. Proteome Res.* 6 (2007) 552-558.
- [73] K.H. Pietilainen, M. Sysi-Aho, A. Rissanen, T. Seppanen-Laakso, H. Yki-Jarvinen, J. Kaprio, M. Oresic, Acquired obesity is associated with changes in the serum lipidomic profile independent of genetic effects--a monozygotic twin study, *PLoS One* 2 (2007).
- [74] R. Laaksonen, M. Katajamaa, H. Paiva, M. Sysi-Aho, L. Saarinen, P. Junni, D. Lutjohann, J. Smet, R. Van Coster, T. Seppanen-Laakso, T. Lehtimaki, J. Soini, M. Oresic, A systems biology strategy reveals biological pathways and plasma biomarker candidates for potentially toxic statin-induced changes in muscle, *PLoS One* 1 (2006).
- [75] L.W. Jia, C. Wang, H.W. Kong, Z.W. Cai, G.W. Xu, Plasma phospholipid metabolic profiling and biomarkers of mouse IgA nephropathy, *Metabolomics* 2 (2006) 95-104.
- [76] C. Wang, H.W. Kong, Y.F. Guan, J. Yang, J.R. Gu, S.L. Yang, G.W. Xu, Plasma phospholipid metabolic profiling and biomarkers of type 2 diabetes mellitus based on high-performance liquid chromatography/electrospray mass spectrometry and multivariate statistical analysis, *Anal. Chem.* 77 (2005) 4108-4116.
- [77] S. Uran, A. Larsen, P.B. Jacobsen, T. Skotland, Analysis of phospholipid species in human blood using normal-phase liquid chromatography coupled with electrospray ionization ion-trap tandem mass spectrometry, *J. Chromatogr. B* 758 (2001) 265-275.
- [78] J. Li, C. Hu, X. Zhao, W. Dai, S. Chen, X. Lu, G. Xu, Large-scaled human serum sphingolipid profiling by using reversed-phase liquid chromatography coupled with dynamic multiple reaction monitoring of mass spectrometry: Method development and application in hepatocellular carcinoma, *J. Chromatogr. A* 1320 (2013) 103-110.
- [79] K. Hanhineva, T. Barri, M. Kolehmainen, J. Pekkinen, J. Pihlajamaki, A. Vesterbacka, G. Solano-Aguilar, H. Mykkanen, L.O. Dragsted, J.F. Urban, Jr., K. Poutanen, Comparative nontargeted profiling of metabolic changes in tissues and biofluids in high-fat diet-fed Ossabaw pig, *J. Proteome Res.* 12 (2013) 3980-3992.
- [80] E.P. Rhee, S. Cheng, M.G. Larson, G.A. Walford, G.D. Lewis, E. McCabe, E. Yang, L. Farrell, C.S. Fox, C.J. O'Donnell, S.A. Carr, R.S. Vasani, J.C. Florez, C.B. Clish, T.J. Wang, R.E. Gerszten, Lipid profiling identifies a triacylglycerol signature of insulin resistance and improves diabetes prediction in humans, *J. Clin. Invest.* 121 (2011) 1402-1411.
- [81] S.S. Bird, B.S. Kristal, Serum lipidomics profiling using an Ascentis Express fused-core C18 column, *Supelco Reporter Newsletters* 29.5 (2011).
- [82] S. Bijlsma, I. Bobeldijk, E.R. Verheij, R. Ramaker, S. Kochhar, I.A. Macdonald, B. van Ommen, A.K. Smilde, Large-scale human metabolomics studies: a strategy for data (pre-) processing and validation, *Anal. Chem.* 78 (2006) 567-574.
- [83] J. van Smeden, W.A. Boiten, T. Hankemeier, R. Rissmann, J.A. Bouwstra, R.J. Vreeken, Combined LC/MS-platform for analysis of all major stratum corneum lipids, and the profiling of skin substitutes, *Biochim. Biophys. Acta Mol. Cell Biol. Lipids* 1841 (2014) 70-79.
- [84] E. Cifkova, M. Holcapek, M. Lisa, Nontargeted lipidomic characterization of porcine organs using hydrophilic interaction liquid chromatography and off-line two-dimensional liquid chromatography-electrospray ionization mass spectrometry, *Lipids* 48 (2013) 915-928.
- [85] E. Sokol, R. Almeida, H.K. Hannibal-Bach, D. Kotowska, J. Vogt, J. Baumgart, K. Kristiansen, R. Nitsch, J. Knudsen, C.S. Ejsing, Profiling of lipid species by normal-phase liquid chromatography, nanoelectrospray ionization, and ion trap-orbitrap mass spectrometry, *Anal. Biochem.* 443 (2013) 88-96.

- [86] S.L. Chen, M. Hoene, J. Li, Y.J. Li, X.J. Zhao, H.U. Haring, E.D. Schleicher, C. Weigert, G.W. Xu, R. Lehmann, Simultaneous extraction of metabolome and lipidome with methyl tert-butyl ether from a single small tissue sample for ultra-high performance liquid chromatography/mass spectrometry, *J. Chromatogr. A* 1298 (2013) 9-16.
- [87] Y.M. Cai, Y. Gao, G.G. Tan, S. Wu, X. Dong, Z.Y. Lou, Z.Y. Zhu, Y.F. Chai, Myocardial lipidomics profiling delineate the toxicity of traditional Chinese medicine *Aconiti Lateralis radix praeparata*, *J. Ethnopharmacol.* 147 (2013) 349-356.
- [88] Y. Sato, F. Bernier, I. Suzuki, S. Kotani, M. Nakagawa, Y. Oda, Comparative lipidomics of mouse brain exposed to enriched environment, *J. Lipid Res.* 54 (2013) 2687-2696.
- [89] R.B. Chan, T.G. Oliveira, E.P. Cortes, L.S. Honig, K.E. Duff, S.A. Small, M.R. Wenk, G.H. Shui, G. Di Paolo, Comparative lipidomic analysis of mouse and human brain with Alzheimer disease, *J. Biol. Chem.* 287 (2012) 2678-2688.
- [90] N. Acar, O. Berdeaux, S. Gregoire, S. Cabaret, L. Martine, P. Gain, G. Thuret, C.P. Creuzot-Garcher, A.M. Bron, L. Bretillon, Lipid composition of the human eye: are red blood cells a good mirror of retinal and optic nerve fatty acids?, *PLoS One* 7 (2012).
- [91] L. Abdullah, J.E. Evans, A. Bishop, J.M. Reed, G. Crynen, J. Phillips, R. Pelot, M.A. Mullan, A. Ferro, C.M. Mullan, M.J. Mullan, G. Ait-Ghezala, F.C. Crawford, Lipidomic profiling of phosphocholine containing brain lipids in mice with sensorimotor deficits and anxiety-like features after exposure to Gulf War agents, *Neuromol. Med.* 14 (2012) 349-361.
- [92] C.H. Tang, P.N. Tsao, C.Y. Lin, L.S. Fang, S.H. Lee, W.H. Wang, Phosphorylcholine-containing lipid molecular species profiling in biological tissue using a fast HPLC/QqQ-MS method, *Anal. Bioanal. Chem.* 404 (2012) 2949-2961.
- [93] A.K. Samhan-Arias, J. Ji, O.M. Demidova, L.J. Sparvero, W. Feng, V. Tyurin, Y.Y. Tyurina, M.W. Epperly, A.A. Shvedova, J.S. Greenberger, H. Bayir, V.E. Kagan, A.A. Amoscato, Oxidized phospholipids as biomarkers of tissue and cell damage with a focus on cardiolipin, *Biochim. Biophys. Acta-Biomembr.* 1818 (2012) 2413-2423.
- [94] M. Lisa, E. Cifkova, M. Holcapek, Lipidomic profiling of biological tissues using off-line two-dimensional high-performance liquid chromatography mass spectrometry, *J. Chromatogr. A* 1218 (2011) 5146-5156.
- [95] J.C. Garcia-Canaveras, M.T. Donato, J.V. Castell, A. Lahoz, A comprehensive untargeted metabonomic analysis of human steatotic liver tissue by RP and HILIC chromatography coupled to mass spectrometry reveals important metabolic alterations, *J. Proteome Res.* 10 (2011) 4825-4834.
- [96] S.M. Lam, L. Tong, S.S. Yong, B.W. Li, S.S. Chaurasia, G.H. Shui, M.R. Wenk, Meibum lipid composition in Asians with dry eye disease, *PLoS One* 6 (2011).
- [97] S. Chen, Lipidomics of the nervous system: Phospholipidomics by liquid chromatography coupled to mass spectrometry or tandem mass spectrometry, *Neuroproteomics* 57 (2011) 253-271.
- [98] M. Hilvo, C. Denkert, L. Lehtinen, B. Muller, S. Brockmoller, T. Seppanen-Laakso, J. Budczies, E. Bucher, L. Yetukuri, S. Castillo, E. Berg, H. Nygren, M. Sysi-Aho, J.L. Griffin, O. Fiehn, S. Loibl, C. Richter-Ehrenstein, C. Radke, T. Hyotylainen, O. Kallioniemi, K. Iljin, M. Oresic, Novel theranostic opportunities offered by characterization of altered membrane lipid metabolism in breast cancer progression, *Cancer Res.* 71 (2011) 3236-3245.
- [99] D. Cheng, A.M. Jenner, G. Shui, W.F. Cheong, T.W. Mitchell, J.R. Nealon, W.S. Kim, H. McCann, M.R. Wenk, G.M. Halliday, B. Garner, Lipid pathway alterations in Parkinson's disease primary visual cortex, *PLoS One* 6 (2011) e17299.
- [100] C.X. Hu, M. Hoene, X.J. Zhao, H.U. Haring, E. Schleicher, R. Lehmann, X.L. Han, G.W. Xu, C. Weigert, Lipidomics analysis reveals efficient storage of hepatic triacylglycerides enriched in unsaturated fatty acids after one bout of exercise in mice, *PLoS One* 5 (2010).
- [101] H. Nakanishi, Y. Iida, T. Shimizu, R. Taguchi, Separation and quantification of sn-1 and sn-2 fatty acid positional isomers in phosphatidylcholine by RPLC-ESIMS/MS, *J. Biochem.* 147 (2010) 245-256.
- [102] R. Taguchi, M. Ishikawa, Precise and global identification of phospholipid molecular species by an Orbitrap mass spectrometer and automated search engine Lipid Search, *J. Chromatogr. A* 1217 (2010) 4229-4239.



- [103] H.G. Nie, R.R. Liu, Y.Y. Yang, Y. Bai, Y.F. Guan, D.Q. Qian, T. Wang, H.W. Liu, Lipid profiling of rat peritoneal surface layers by online normal- and reversed-phase 2D LC QToF-MS, *J. Lipid Res.* 51 (2010) 2833-2844.
- [104] K. Ikeda, Y. Oike, T. Shimizu, R. Taguchi, Global analysis of triacylglycerols including oxidized molecular species by reverse-phase high resolution LC/ESI-QTOF MS/MS, *J. Chromatogr. B* 877 (2009) 2639-2647.
- [105] I. Smyth, D.F. Hacking, A.A. Hilton, N. Mukhamedova, P.J. Meikle, S. Ellis, K. Slattery, J.E. Collinge, C.A. de Graaf, M. Bahlo, D. Sviridov, B.T. Kile, D.J. Hilton, A mouse model of harlequin ichthyosis delineates a key role for Abca12 in lipid homeostasis, *PLoS Genet.* 4 (2008).
- [106] H. Ogiso, T. Suzuki, R. Taguchi, Development of a reverse-phase liquid chromatography electrospray ionization mass spectrometry method for lipidomics, improving detection of phosphatidic acid and phosphatidylserine, *Anal. Biochem.* 375 (2008) 124-131.
- [107] D.A. Ford, J.K. Monda, R.S. Brush, R.E. Anderson, M.J. Richards, S.J. Fliesler, Lipidomic analysis of the retina in a rat model of Smith-Lemli-Opitz syndrome: alterations in docosahexaenoic acid content of phospholipid molecular species, *J. Neurochem.* 105 (2008) 1032-1047.
- [108] T.K. Pilvi, T. Seppanen-Laakso, H. Simolin, P. Finckenberg, A. Huotari, K.H. Herzig, R. Korpela, M. Oresic, E.M. Mervaala, Metabolomic changes in fatty liver can be modified by dietary protein and calcium during energy restriction, *World J. Gastroenterol* 14 (2008) 4462-4472.
- [109] M. Sysi-Aho, M. Katajamaa, L. Yetukuri, M. Oresic, Normalization method for metabolomics data using optimal selection of multiple internal standards, *BMC Bioinformatics* 8 (2007).
- [110] M. Kolak, J. Westerbacka, V.R. Velagapudi, D. Wagsater, L. Yetukuri, J. Makkonen, A. Rissanen, A.M. Hakkinen, M. Lindell, R. Bergholm, A. Hamsten, P. Eriksson, R.M. Fisher, M. Oresic, H. Yki-Jarvinen, Adipose tissue inflammation and increased ceramide content characterize subjects with high liver fat content independent of obesity, *Diabetes* 56 (2007) 1960-1968.
- [111] D.Y. Bang, E. Ahn, M.H. Moon, Shotgun analysis of phospholipids from mouse liver and brain by nanoflow liquid chromatography/tandem mass spectrometry, *J. Chromatogr. B* 852 (2007) 268-277.
- [112] G. Medina-Gomez, S.L. Gray, L. Yetukuri, K. Shimomura, S. Virtue, M. Campbell, R.K. Curtis, M. Jimenez-Linan, M. Blount, G.S. Yeo, M. Lopez, T. Seppanen-Laakso, F.M. Ashcroft, M. Oresic, A. Vidal-Puig, PPAR gamma 2 prevents lipotoxicity by controlling adipose tissue expandability and peripheral lipid metabolism, *PLoS Genet.* 3 (2007).
- [113] T. Houjou, K. Yamatani, M. Imagawa, T. Shimizu, R. Taguchi, A shotgun tandem mass spectrometric analysis of phospholipids with normal-phase and/or reverse-phase liquid chromatography/electrospray ionization mass spectrometry, *Rapid Commun. Mass Spectrom.* 19 (2005) 654-666.
- [114] M. Hermansson, A. Uphoff, R. Kakela, P. Somerharju, Automated quantitative analysis of complex lipidomes by liquid chromatography/mass spectrometry, *Anal. Chem.* 77 (2005) 2166-2175.
- [115] G. Medina-Gomez, S. Virtue, C. Lelliott, R. Boiani, M. Campbell, C. Christodoulides, C. Perrin, M. Jimenez-Linan, M. Blount, J. Dixon, D. Zahn, R.R. Thresher, S. Aparicio, M. Carlton, W.H. Colledge, M.I. Kettunen, T. Seppanen-Laakso, J.K. Sethi, S. O'Rahilly, K. Brindle, S. Cinti, M. Oresic, R. Burcelin, A. Vidal-Puig, The link between nutritional status and insulin sensitivity is dependent on the adipocyte-specific peroxisome proliferator-activated receptor-gamma 2 isoform, *Diabetes* 54 (2005) 1706-1716.
- [116] C.B. Clish, E. Davidov, M. Oresic, T.N. Plasterer, G. Lavine, T. Londo, M. Meys, P. Snell, W. Stochaj, A. Adourian, X. Zhang, N. Morel, E. Neumann, E. Verheij, J.T. Vogels, L.M. Havekes, N. Afeyan, F. Regnier, J. van der Greef, S. Naylor, Integrative biological analysis of the APOE\*3-leiden transgenic mouse, *OMICS* 8 (2004) 3-13.
- [117] J.P. Kurvinen, J. Aaltonen, A. Kuksis, H. Kallio, Software algorithm for automatic interpretation of mass spectra of glycerolipids, *Rapid Commun. Mass Spectrom.* 16 (2002) 1812-1820.
- [118] M.A. Forrellad, M. McNeil, M.P. Santangelo, F.C. Blanco, E. Garcia, L.I. Klepp, J. Huff, M. Niederweis, M. Jackson, F. Bigi, Role of the Mce1 transporter in the lipid homeostasis of *Mycobacterium tuberculosis*, *Tuberculosis* (2014).
- [119] D.Y. Chen, X.J. Yan, J.L. Xu, X.L. Su, L.J. Li, Lipidomic profiling and discovery of lipid biomarkers in *Stephanodiscus* sp under cold stress, *Metabolomics* 9 (2013) 949-959.

- [120] B. Qiao, H. Lu, Y.X. Cao, R. Chen, Y.J. Yuan, Phospholipid profiles of *Penicillium chrysogenum* in different scales of fermentations, *Eng. Life Sci.* 13 (2013) 496-505.
- [121] N. Lu, D. Wei, F. Chen, S.T. Yang, Lipidomic profiling reveals lipid regulation in the snow alga *Chlamydomonas nivalis* in response to nitrate or phosphate deprivation, *Process Biochem.* 48 (2013) 605-613.
- [122] J. Li, M. Hoene, X. Zhao, S. Chen, H. Wei, H.U. Haring, X. Lin, Z. Zeng, C. Weigert, R. Lehmann, G. Xu, Stable isotope-assisted lipidomics combined with nontargeted isotopomer filtering, a tool to unravel the complex dynamics of lipid metabolism, *Anal. Chem.* 85 (2013) 4651-4657.
- [123] A. Koeberle, H. Shindou, S.C. Koeberle, S.A. Laufer, T. Shimizu, O. Werz, Arachidonoyl-phosphatidylcholine oscillates during the cell cycle and counteracts proliferation by suppressing Akt membrane binding, *P. Natl. Acad. Sci. USA* 110 (2013) 2546-2551.
- [124] M.L. Doria, C.Z. Cotrim, C. Simoes, B. Macedo, P. Domingues, M.R. Domingues, L.A. Helguero, Lipidomic analysis of phospholipids from human mammary epithelial and breast cancer cell lines, *J. Cell. Physiol.* 228 (2013) 457-468.
- [125] C. Bure, S. Ayciriex, E. Testet, J.M. Schmitter, A single run LC-MS/MS method for phospholipidomics, *Anal. Bioanal. Chem.* 405 (2013) 203-213.
- [126] D.R. Santinha, M.L. Doria, B.M. Neves, E.A. Maciel, J. Martins, L. Helguero, P. Domingues, M.T. Cruz, M.R. Domingues, Prospective phospholipid markers for skin sensitization prediction in keratinocytes: A phospholipidomic approach, *Arch. Biochem. Biophys.* 533 (2013) 33-41.
- [127] S.K. Wiedmer, A. Robciuc, J. Kronholm, J.M. Holopainen, T. Hyotylainen, Chromatographic lipid profiling of stress-exposed cells, *J. Sep. Sci.* 35 (2012) 1845-1853.
- [128] J. Yang, M.Z. Ding, B.Z. Li, Z.L. Liu, X. Wang, Y.J. Yuan, Integrated phospholipidomics and transcriptomics analysis of *Saccharomyces cerevisiae* with enhanced tolerance to a mixture of acetic acid, furfural, and phenol, *OMICS* 16 (2012) 374-386.
- [129] R.J. Xu, B. Qiao, B.Z. Li, H. Lu, Y. Chen, Y.J. Yuan, Comparative lipidomic analysis of *Cephalosporium acremonium* insights into industrial and pilot fermentations, *Biotechnol. Bioproc. E.* 17 (2012) 259-269.
- [130] N. Lu, D. Wei, F. Chen, S.T. Yang, Lipidomic profiling and discovery of lipid biomarkers in snow alga *Chlamydomonas nivalis* under salt stress, *Eur. J. Lipid Sci. Tech.* 114 (2012) 253-265.
- [131] F. Gruber, W. Bicker, O.V. Oskolkova, E. Tschachler, V.N. Bochkov, A simplified procedure for semi-targeted lipidomic analysis of oxidized phosphatidylcholines induced by UVA irradiation, *J. Lipid Res.* 53 (2012) 1232-1242.
- [132] E. Layre, L. Sweet, S. Hong, C.A. Madigan, D. Desjardins, D.C. Young, T.Y. Cheng, J.W. Armand, K. Kim, I.C. Shamputa, M.J. McConnell, C.A. Debono, S.M. Behar, A.J. Minnaard, M. Murray, C.E. Barry, I. Matsunaga, D.B. Moody, A comparative lipidomics platform for chemotaxonomic analysis of *Mycobacterium tuberculosis*, *Chem. Biol.* 18 (2011) 1537-1549.
- [133] X. Li, Y.J. Yuan, Lipidomic analysis of apoptotic hela cells induced by paclitaxel, *OMICS* 15 (2011) 655-664.
- [134] J. Yang, S. Yang, X. Gao, Y.J. Yuan, Integrative investigation of lipidome and signal pathways in human endothelial cells under oxidative stress, *Mol. Biosyst.* 7 (2011) 2428-2440.
- [135] R.U. Jeong, S. Lim, M.O. Kim, M.H. Moon, Effect of d-allose on prostate cancer cell lines: phospholipid profiling by nanoflow liquid chromatography-tandem mass spectrometry, *Anal. Bioanal. Chem.* 401 (2011) 689-698.
- [136] M.J. Sartain, D.L. Dick, C.D. Rithner, D.C. Crick, J.T. Belisle, Lipidomic analyses of *Mycobacterium tuberculosis* based on accurate mass measurements and the novel "Mtb LipidDB", *J. Lipid Res.* 52 (2011) 861-872.
- [137] J. Xia, A.D. Jones, M.W. Lau, Y.J. Yuan, B.E. Dale, V. Balan, Comparative lipidomic profiling of xylose-metabolizing *S. cerevisiae* and its parental strain in different media reveals correlations between membrane lipids and fermentation capacity, *Biotechnol. Bioeng.* 108 (2011) 12-21.
- [138] G. Shui, X.L. Guan, P. Gopalakrishnan, Y.K. Xue, J.S.Y. Goh, H.Y. Yang, M.R. Wenk, Characterization of substrate preference for Slc1p and Cst26p in *Saccharomyces cerevisiae* using lipidomic approaches and an LPAAT activity assay, *PLoS One* 5 (2010).

- [139] G.H. Shui, X.L. Guan, C.P. Low, G.H. Chua, J.S.Y. Goh, H.Y. Yang, M.R. Wenk, Toward one step analysis of cellular lipidomes using liquid chromatography coupled with mass spectrometry: application to *Saccharomyces cerevisiae* and *Schizosaccharomyces pombe* lipidomics, *Mol. Biosyst.* 6 (2010) 1008-1017.
- [140] H.C. Tian, J. Zhou, B. Qiao, Y. Liu, J.M. Xia, Y.J. Yuan, Lipidome profiling of *Saccharomyces cerevisiae* reveals pitching rate-dependent fermentative performance, *Appl. Microbiol. Biot.* 87 (2010) 1507-1516.
- [141] T. Sana, S. Fischer, A. Saghatelian, J. Cardia, Lipidomics discovery profiling and targeted LC/MS analysis in 3T3-L1 differentiating adipocytes, *Agilent Application Note 5990-4212EN* (2009).
- [142] H. Nakanishi, H. Ogiso, R. Taguchi, in D. Armstrong (Editor), *Lipidomics, Methods Mol Biol*, New York, 2009, p. 287-313.
- [143] J.M. Xia, Y.J. Yuan, Comparative lipidomics of four strains of *Saccharomyces cerevisiae* reveals different responses to furfural, phenol, and acetic Acid, *J. Agr. Food Chem.* 57 (2009) 99-108.
- [144] P.P. Han, Y.J. Yuan, Lipidomic analysis reveals activation of phospholipid signaling in mechanotransduction of *Taxus cuspidata* cells in response to shear stress, *FASEB J.* 23 (2009) 623-630.
- [145] S. Yang, S.H. Lu, Y.J. Yuan, Lipidomic analysis reveals differential defense responses of *Taxus cuspidata* cells to two elicitors, methyl jasmonate and cerium (Ce<sup>4+</sup>), *Biochim. Biophys. Acta Mol. Cell Biol. Lipids* 1781 (2008) 123-134.
- [146] P.M. Hutchins, R.M. Barkley, R.C. Murphy, Separation of cellular nonpolar neutral lipids by normal-phase chromatography and analysis by electrospray ionization mass spectrometry, *J. Lipid Res.* 49 (2008) 804-813.
- [147] R. Chan, P.D. Uchil, J. Jin, G. Shui, D.E. Ott, W. Mothes, M.R. Wenk, Retroviruses human immunodeficiency virus and murine leukemia virus are enriched in phosphoinositides, *J. Virol.* 82 (2008) 11228-11238.
- [148] S. Yang, B. Qiao, S.H. Lu, Y.J. Yuan, Comparative lipidomics analysis of cellular development and apoptosis in two *Taxus* cell lines, *Biochim. Biophys. Acta Mol. Cell Biol. Lipids* 1771 (2007) 600-612.
- [149] G.H. Shui, A.K. Bendt, K. Pethe, T. Dick, M.R. Wenk, Sensitive profiling of chemically diverse bioactive lipids, *J. Lipid Res.* 48 (2007) 1976-1984.
- [150] R. Taguchi, J. Hayakawa, Y. Takeuchi, M. Ishida, Two-dimensional analysis of phospholipids by capillary liquid chromatography/electrospray ionization mass spectrometry, *J. Mass Spectrom.* 35 (2000) 953-966.
- [151] D.A. Peake, Y. Yokoi, J. Wang, Y. Huang, A new lipid software workflow for processing orbitrap-based global lipidomics data in translational and systems biology research, *Thermo Scientific Application Note* (2013).
- [152] C. Chitraju, M. Trotsmuller, J. Hartler, H. Wolinski, G.G. Thallinger, G. Haemmerle, R. Zechner, R. Zimmermann, H.C. Kofeler, F. Spener, The impact of genetic stress by ATGL deficiency on the lipidome of lipid droplets from murine hepatocytes, *J. Lipid Res.* 54 (2013) 2185-2194.
- [153] A. Fauland, H. Kofeler, M. Trotsmuller, A. Knopf, J. Hartler, A. Eberl, C. Chitraju, E. Lankmayr, F. Spener, A comprehensive method for lipid profiling by liquid chromatography-ion cyclotron resonance mass spectrometry, *J. Lipid Res.* 52 (2011) 2314-2322.
- [154] L.A. Zheng, R. T'Kind, S. Decuypere, S.J. von Freyend, G.H. Coombs, D.G. Watson, Profiling of lipids in *Leishmania donovani* using hydrophilic interaction chromatography in combination with Fourier transform mass spectrometry, *Rapid Commun. Mass Spectrom.* 24 (2010) 2074-2082.
- [155] Y. Okazaki, Y. Kamide, M.Y. Hirai, K. Saito, Plant lipidomics based on hydrophilic interaction chromatography coupled to ion trap time-of-flight mass spectrometry, *Metabolomics* 9 (2013) 121-131.
- [156] T. Degenkolbe, P. Giavalisco, E. Zuther, B. Seiwert, D.K. Hinch, L. Willmitzer, Differential remodeling of the lipidome during cold acclimation in natural accessions of *Arabidopsis thaliana*, *Plant J.* 72 (2012) 972-982.
- [157] A. Burgos, J. Szymanski, B. Seiwert, T. Degenkolbe, M.A. Hannah, P. Giavalisco, L. Willmitzer, Analysis of short-term changes in the *Arabidopsis thaliana* glycerolipidome in response to temperature and light, *Plant J.* 66 (2011) 656-668.
- [158] J. Hummel, S. Segu, Y. Li, S. Irgang, J. Jueppner, P. Giavalisco, Ultra performance liquid chromatography and high resolution mass spectrometry for the analysis of plant lipids, *Front. Plant Sci.* 2 (2011) 54.

- [159] P. Giavalisco, Y. Li, A. Matthes, A. Eckhardt, H.M. Hubberten, H. Hesse, S. Segu, J. Hummel, K. Kohl, L. Willmitzer, Elemental formula annotation of polar and lipophilic metabolites using C-13, N-15 and S-34 isotope labelling, in combination with high- resolution mass spectrometry, *Plant J.* 68 (2011) 364-376.
- [160] T. Bamba, N. Shimonishi, A. Matsubara, K. Hirata, Y. Nakazawa, A. Kobayashi, E. Fukusaki, High throughput and exhaustive analysis of diverse lipids by using supercritical fluid chromatography-mass spectrometry for metabolomics, *J. Biosci. Bioeng.* 105 (2008) 460-469.
- [161] C.Y. Botte, Y. Yamaryo-Botte, T.W.T. Rupasinghe, K.A. Mullin, J.I. MacRae, T.P. Spurck, M. Kalanon, M.J. Shears, R.L. Coppel, P.K. Crellin, E. Marechal, M.J. McConville, G.I. McFadden, Atypical lipid composition in the purified relict plastid (apicoplast) of malaria parasites, *P. Natl. Acad. Sci. USA* 110 (2013) 7506-7511.
- [162] L. Klug, P. Tarazona, C. Gruber, K. Grillitsch, B. Gasser, M. Trotsmuller, H. Kofeler, E. Leitner, I. Feussner, D. Mattanovich, F. Altmann, G. Daum, The lipidome and proteome of microsomes from the methylotrophic yeast *Pichia pastoris*, *Biochim. Biophys. Acta Mol. Cell Biol. Lipids* 1841 (2014) 215-226.
- [163] S.S. Bird, V.R. Marur, I.G. Stavrovskaya, B.S. Kristal, Qualitative characterization of the rat liver mitochondrial lipidome using LC-MS profiling and high energy collisional dissociation (HCD) all ion fragmentation, *Metabolomics* 9 (2013) S67-S83.
- [164] S.S. Bird, V.R. Marur, M.J. Sniatynski, H.K. Greenberg, B.S. Kristal, Lipidomics profiling by high-resolution LC-MS and high-energy collisional dissociation fragmentation: Focus on characterization of mitochondrial cardiolipins and monolysocardiolipins, *Anal. Chem.* 83 (2011) 940-949.
- [165] J. Kim, C.L. Hoppel, Comprehensive approach to the quantitative analysis of mitochondrial phospholipids by HPLC-MS, *J. Chromatogr. B* 912 (2013) 105-114.
- [166] J. Ji, A.E. Kline, A. Amoscato, A.K. Samhan-Arias, L.J. Sparvero, V.A. Tyurin, Y.Y. Tyurina, B. Fink, M.D. Manole, A.M. Puccio, D.O. Okonkwo, J.P. Cheng, H. Alexander, R.S.B. Clark, P.M. Kochanek, P. Wipf, V.E. Kagan, H. Bayir, Lipidomics identifies cardiolipin oxidation as a mitochondrial target for redox therapy of brain injury, *Nat. Neurosci.* 15 (2012) 1407-1413.
- [167] U. Sommer, H. Herscovitz, F.K. Welty, C.E. Costello, LC-MS-based method for the qualitative and quantitative analysis of complex lipid mixtures, *J. Lipid Res.* 47 (2006) 804-814.
- [168] A. Reis, A. Rudnitskaya, G.J. Blackburn, N.M. Fauzi, A.R. Pitt, C.M. Spickett, A comparison of five lipid extraction solvent systems for lipidomic studies of human LDL, *J. Lipid Res.* 54 (2013) 1812-1824.
- [169] L. Camont, M. Lhomme, F. Rached, W. Le Goff, A. Negre-Salvayre, R. Salvayre, C. Calzada, M. Lagarde, M.J. Chapman, A. Kontush, Small, dense high-density lipoprotein-3 particles are enriched in negatively charged phospholipids: relevance to cellular cholesterol efflux, antioxidative, antithrombotic, anti-inflammatory, and antiapoptotic functionalities, *Arterioscler. Thromb. Vasc. Biol.* 33 (2013) 2715-2723.
- [170] C.M. Spickett, A. Reis, A.R. Pitt, Identification of oxidized phospholipids by electrospray ionization mass spectrometry and LC-MS using a QQLIT instrument, *Free Radical Bio. Med.* 51 (2011) 2133-2149.
- [171] Q. Zhou, B. Gao, X. Zhang, Y. Xu, H. Shi, L. Yu, Chemical profiling of triacylglycerols and diacylglycerols in cow milk fat by ultra-performance convergence chromatography combined with a quadrupole time-of-flight mass spectrometry, *Food Chem.* 143 (2014) 199-204.
- [172] P. Dugo, N. Fawzy, F. Cichello, F. Cacciola, P. Donato, L. Mondello, Stop-flow comprehensive two-dimensional liquid chromatography combined with mass spectrometric detection for phospholipid analysis, *J. Chromatogr. A* 1278 (2013) 46-53.
- [173] V.C. Trenerry, G. Akbaridoust, T. Plozza, S. Rochfort, W.J. Wales, M. Auldist, S. Ajlouni, Ultra-high-performance liquid chromatography-ion trap mass spectrometry characterisation of milk polar lipids from dairy cows fed different diets, *Food Chem.* 141 (2013) 1451-1460.
- [174] M. Tarvainen, J.P. Suomela, H. Kallio, Ultra high performance liquid chromatography-mass spectrometric analysis of oxidized free fatty acids and acylglycerols, *Eur. J. Lipid Sci. Tech.* 113 (2011) 409-422.
- [175] X.L. Guan, G. Cestra, G.H. Shui, A. Kuhrs, R.B. Schittenhelm, E. Hafen, F.G. van der Goot, C.C. Robinett, M. Gatti, M. Gonzalez-Gaitan, M.R. Wenk, Biochemical membrane lipidomics during *Drosophila* development, *Dev. Cell* 24 (2013) 98-111.
- [176] X.L. Su, J.L. Xu, X.J. Yan, P. Zhao, J.J. Chen, C.X. Zhou, F. Zhao, S. Li, Lipidomic changes during different growth stages of *Nitzschia closterium f. minutissima*, *Metabolomics* 9 (2013) 300-310.

- [177] S. Baig, J.Y. Lim, Z. Fernandis, M.R. Wenk, A. Kale, L.L. Su, A. Biswas, S. Vasoo, G. Shui, M. Choolani, Lipidomic analysis of human placental Syncytiotrophoblast microvesicles in adverse pregnancy outcomes, *Placenta* 34 (2013) 436-442.
- [178] M. Giera, A. Ioan-Facsinay, R. Toes, F. Gao, J. Dalli, A.M. Deelder, C.N. Serhan, O.A. Mayboroda, Lipid and lipid mediator profiling of human synovial fluid in rheumatoid arthritis patients by means of LC-MS/MS, *Biochim. Biophys. Acta Mol. Cell Biol. Lipids* 1821 (2012) 1415-1424.
- [179] A.H. Rantamaki, T. Seppanen-Laakso, M. Oresic, M. Jauhiainen, J.M. Holopainen, Human tear fluid lipidome: from composition to function, *PLoS One* 6 (2011).
- [180] C. Chitraju, M. Trotsmuller, J. Hartler, H. Wolinski, G.G. Thallinger, A. Lass, R. Zechner, R. Zimmermann, H.C. Kofeler, F. Spener, Lipidomic analysis of lipid droplets from murine hepatocytes reveals distinct signatures for nutritional stress, *J. Lipid Res.* 53 (2012) 2141-2152.
- [181] D.Y. Bang, S. Lim, M.H. Moon, Effect of ionization modifiers on the simultaneous analysis of all classes of phospholipids by nanoflow liquid chromatography/tandem mass spectrometry in negative ion mode, *J. Chromatogr. A* 1240 (2012) 69-76.
- [182] H.K. Min, S. Lim, B.C. Chung, M.H. Moon, Shotgun lipidomics for candidate biomarkers of urinary phospholipids in prostate cancer, *Anal. Bioanal. Chem.* 399 (2011) 823-830.
- [183] P. Del Boccio, F. Raimondo, D. Pieragostino, L. Morosi, G. Cozzi, P. Sacchetta, F. Magni, M. Pitto, A. Urbani, A hyphenated microLC-Q-TOF-MS platform for exosomal lipidomics investigations: Application to RCC urinary exosomes, *Electrophoresis* 33 (2012) 689-696.
- [184] K.E. Gregory, S.S. Bird, V.S. Gross, V.R. Marur, A.V. Lazarev, W.A. Walker, B.S. Kristal, Method development for fecal lipidomics profiling, *Anal. Chem.* 85 (2013) 1114-1123.
- [185] E. Camera, M. Ludovici, M. Galante, J.L. Sinagra, M. Picardo, Comprehensive analysis of the major lipid classes in sebum by rapid resolution high-performance liquid chromatography and electrospray mass spectrometry, *J. Lipid Res.* 51 (2010) 3377-3388.
